# Supplementary material for: Arsenic trioxide alters the differentiation of mouse embryonic stem cell into cardiomyocytes
Source: PubMed Central journal article supplement (PMC4597215; doi:10.1038/srep14993), 2015-10-08
Supplement: srep14993-s1.pdf [file srep14993-s1.pdf]

## **Arsenic trioxide alters the differentiation of mouse embryonic stem cell into cardiomyocytes**

Paola Rebuzzini<sup>a,d</sup>, Elisa Cebal<sup>b</sup>, Lorenzo Fassina<sup>c,d</sup>, Carlo Alberto Redi<sup>a,d,e</sup>, Maurizio Zuccotti<sup>f,\*</sup> and Silvia Garagna<sup>a,d,\*</sup>

<sup>a</sup>Laboratorio di Biologia dello Sviluppo, Dipartimento di Biologia e Biotecnologie ‘Lazzaro Spallanzani’, Università degli Studi di Pavia, Pavia, Italy;

<sup>b</sup>Laboratorio de Reproducción y Fisiopatología Materno-Embrionaria, Instituto de Fisiología, Biología Molecular y Neurociencias, Departamento de Biodiversidad y Biología Experimental, Facultad de Ciencias Exactas y Naturales, Universidad de Buenos Aires, Buenos Aires, Argentina;

<sup>c</sup>Dipartimento di Ingegneria Industriale e dell’Informazione, Università degli Studi di Pavia, Pavia, Italy;

<sup>d</sup>Center for Health Technologies (CHT), Via Ferrata 1, University of Pavia, Italy;

<sup>e</sup>Centro Ricerche di Medicina Rigenerativa, Fondazione IRCCS Policlinico San Matteo, Pavia, Italy;

<sup>f</sup>Unità di Anatomia, Istologia ed Embriologia, Dipartimento di Scienze Biomediche, Biotecnologiche e Traslazionali, Università degli Studi di Parma, Parma, Italy.

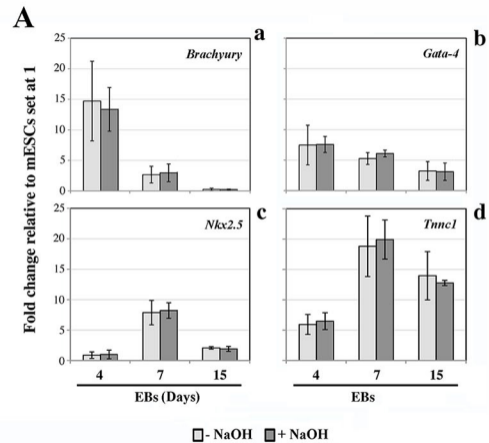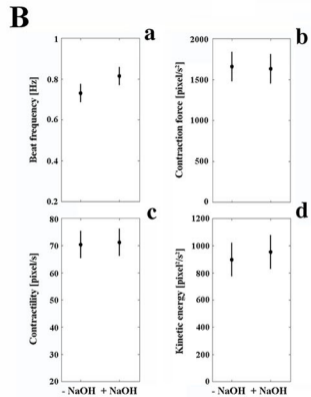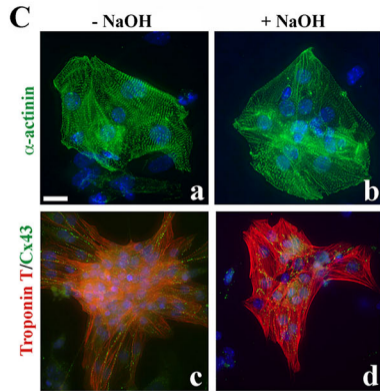

**Figure 1S.** Cardiomyocyte differentiation in the absence or presence of 0.01 N NaOH. **A)** Expression profile of genes that mark mesoderm (**a**, *Brachyury*), cardiac mesoderm (**b**, *Gata-4*; **c**, *Nkx2.5*) and cardiac cells (**d**, *Tnnc1*) throughout the differentiation process. Values are expressed as mean±standard deviation; **B)** Contractile properties of beating syncytia on day 15: **a)** Beat frequency [Hz]; **b)** Contraction force [pixel/s<sup>2</sup>]; **c)** Contractility [pixel/s]; **d)** Kinetic energy [pixel<sup>2</sup>/s<sup>2</sup>]. Horizontal bars represent the 95% confidence interval for the differences between means according to the Least Significant Difference statistical test. **C)** Immunofluorescence localisation of cardiac  $\alpha$ -actinin and of cardiac troponin T (red) and Connexin 43 (green) proteins in cardiomyocytes on day 15. Bar, 20  $\mu$ m.

Three independent sets of experiments were performed.

**Fold change**

**relative to CTR set at 1**

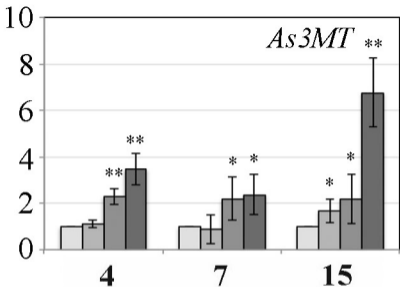

**EBs (days)**

□ CTR   □ 0.1   □ 0.5   □ 1.0

**ATO (μM)**

**Figure 2S.** Expression profile of *As3MT* in CTR and ATO-exposed EBs. Values are expressed as mean±standard deviation. Three independent sets of this experiment were performed. \* $p < 0.05$ ; \*\* $p < 0.001$ .

## Methods

### ***Disaggregation of embryoid bodies***

Briefly, for each experiment, about 100 EBs were mechanically detached and centrifuged at 500 rpm for 5 min and resuspended in 1 ml of “low Ca<sup>2+</sup>-medium” (120 mM NaCl, 5.4 mM KCl, 5 mM sodium pyruvate, 20 mM glucose, 20 mM taurine, 10 mM HEPES) for 15 min at room temperature. Then, cells were incubated in “low Ca<sup>2+</sup>-medium” supplemented with 1 mg/ml collagenase and 30 mM CaCl<sub>2</sub> for 30 min at 37°C. After centrifugation at 500 rpm for 5 min, cells were resuspended in complete culture medium and about 50,000 cells seeded on each 0.1% gelatin-coated coverslip. After 24 h, all cells were washed twice with PBS, fixed in 4% cold paraformaldehyde/PBS. Slides were kept at 4°C until usage.

**Table 1S.** Oligonucleotides used for Real Time PCR amplification.

| Gene             | Primer forward              | Primer Reverse               | Amplicon length (bp) |
|------------------|-----------------------------|------------------------------|----------------------|
| <i>Brachyury</i> | 5' CTCTAAGGAACCACCGGTCA 3'  | 5' AGCATGGACAGACAAGCAGA 3'   | 100                  |
| <i>Gata-4</i>    | 5' AGTTGTGCAGCTAATGCCACT 3' | 5' CTGCTTTGGTAGCAGGTTTTG 3'  | 100                  |
| <i>Nkx2.5</i>    | 5'GATGGGAAAGCTCCCACTATG 3'  | 5'GAGACACCAGGCTACGTCAATA 3'  | 110                  |
| <i>Myh6</i>      | 5' TCACTGCGGAAACTGAAAACG 3' | 5' ATGGCCATGTCCTCGATCTTG 3'  | 100                  |
| <i>Actn2</i>     | 5' AACCTGGCCATGGAAATAGCA 3' | 5' TTCATCGGGTTGGGAGTGTT 3'   | 90                   |
| <i>Tnnc1</i>     | 5' CAGCAAAGGGAAGTCTGAGG 3'  | 5' TGCAGCATCATCTTCAGCTC 3'   | 102                  |
| <i>Tnnt2</i>     | 5' GAAGTTCGACCTGCAGGAAA 3'  | 5' TTCCCACGAGTTTTGGAGAC 3'   | 102                  |
| <i>Tnni3</i>     | 5' GACTTATGCCGACAGCTTAC 3'  | 5' GGTCAGATCTGCAATCTCAGTG 3' | 105                  |
| <i>As3MT</i>     | 5' AAAACAAGGAGCTCGAAGGGG 3' | 5' TTTCGGCTGGCTCTGTCTTAG 3'  | 93                   |
| <i>β2m</i>       | 5' GAATTCACCCCACTGAGACT 3'  | 5' TGCTTGATCACATGTCTCGAT 3'  | 103                  |
